# Supplementary material for: PEGMa modified molybdenum oxide as a NIR photothermal agent for composite thermal/pH-responsive p(NIPAM-co-MAA) microgels
Source: Royal Society of Chemistry journal article supplement (doi:10.1039/c7tc02123b), 2017-01-01
Supplement: c7tc02123b1.pdf [file c7tc02123b1.pdf]

## PEGMa Modified Molybdenum Oxide as a NIR Photothermal agent to Composite Thermal/pH-responsive p(NIPAM-co-MAA)Microgel

Xiaofang Qi<sup>abc</sup>, Jing Peng<sup>abc</sup>, Ning Wang<sup>b</sup>, Hongyun Zou<sup>b</sup> and Dongyan Tang<sup>a,b\*</sup>

### Supporting Information

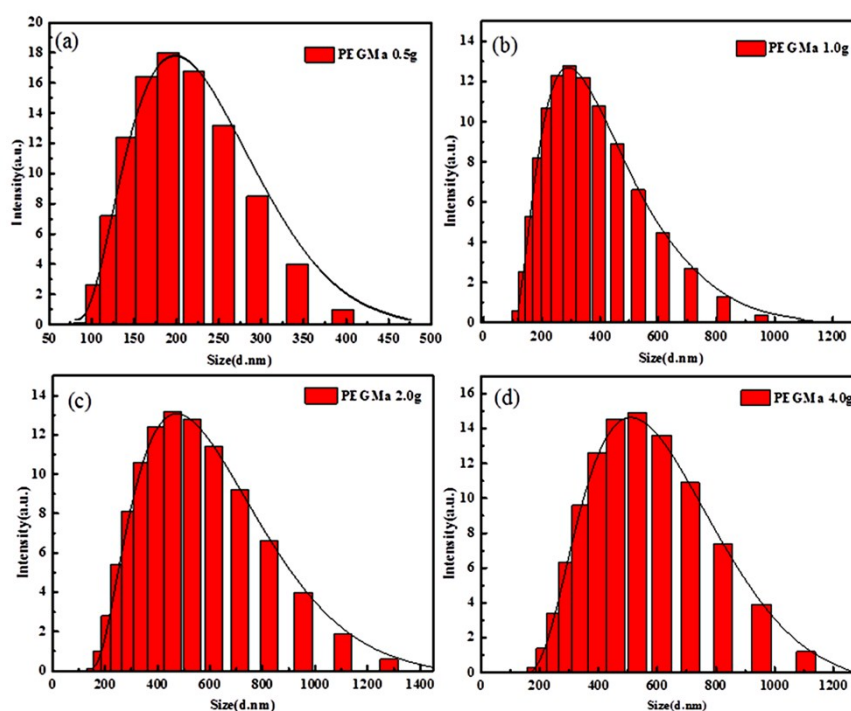

Fig.S1 DLS size and distribution of PEGMa-MoOx

Table S1

Dynamic light scattering (DLS) size of PEGMa-MoOx

| samples                     | $(\text{NH}_4)_6\text{Mo}_7\text{O}_{24}\cdot 4\text{H}_2\text{O}(\text{g})$ | PEGMa(g) | DLS size (nm) |
|-----------------------------|------------------------------------------------------------------------------|----------|---------------|
| PEGMa <sub>0.5g</sub> -MoOx | 0.0865                                                                       | 0.5      | 188.6         |
| PEGMa <sub>1.0g</sub> -MoOx | 0.0865                                                                       | 1.0      | 291.3         |
| PEGMa <sub>2.0g</sub> -MoOx | 0.0865                                                                       | 2.0      | 441.2         |
| PEGMa <sub>4.0g</sub> -MoOx | 0.0865                                                                       | 4.0      | 496.6         |

Table S2

Size and pH value of PEGMa-MoOx/p (NIPAM-co-MAA)NCs

| samples               | MAA(mol) | DLS size (nm) | SEM size (nm) | LCST(°C) |
|-----------------------|----------|---------------|---------------|----------|
| NCs-MAA <sub>5</sub>  | 5        | 495.5         | 440           | 32       |
| NCs-MAA <sub>10</sub> | 10       | 381.0         | 350           | 31       |
| NCs-MAA <sub>20</sub> | 20       | 340.1         | 350           | 29       |
